# Supplementary material for: Impact of Swine and Cattle Manure Treatment on the Microbial Composition and Resistome of Soil and Drainage Water
Source: MDPI journal article supplement (doi:10.3390/microorganisms11010017), 2022-12-21
Supplement: s1 [file s1]

## Supplementary Information

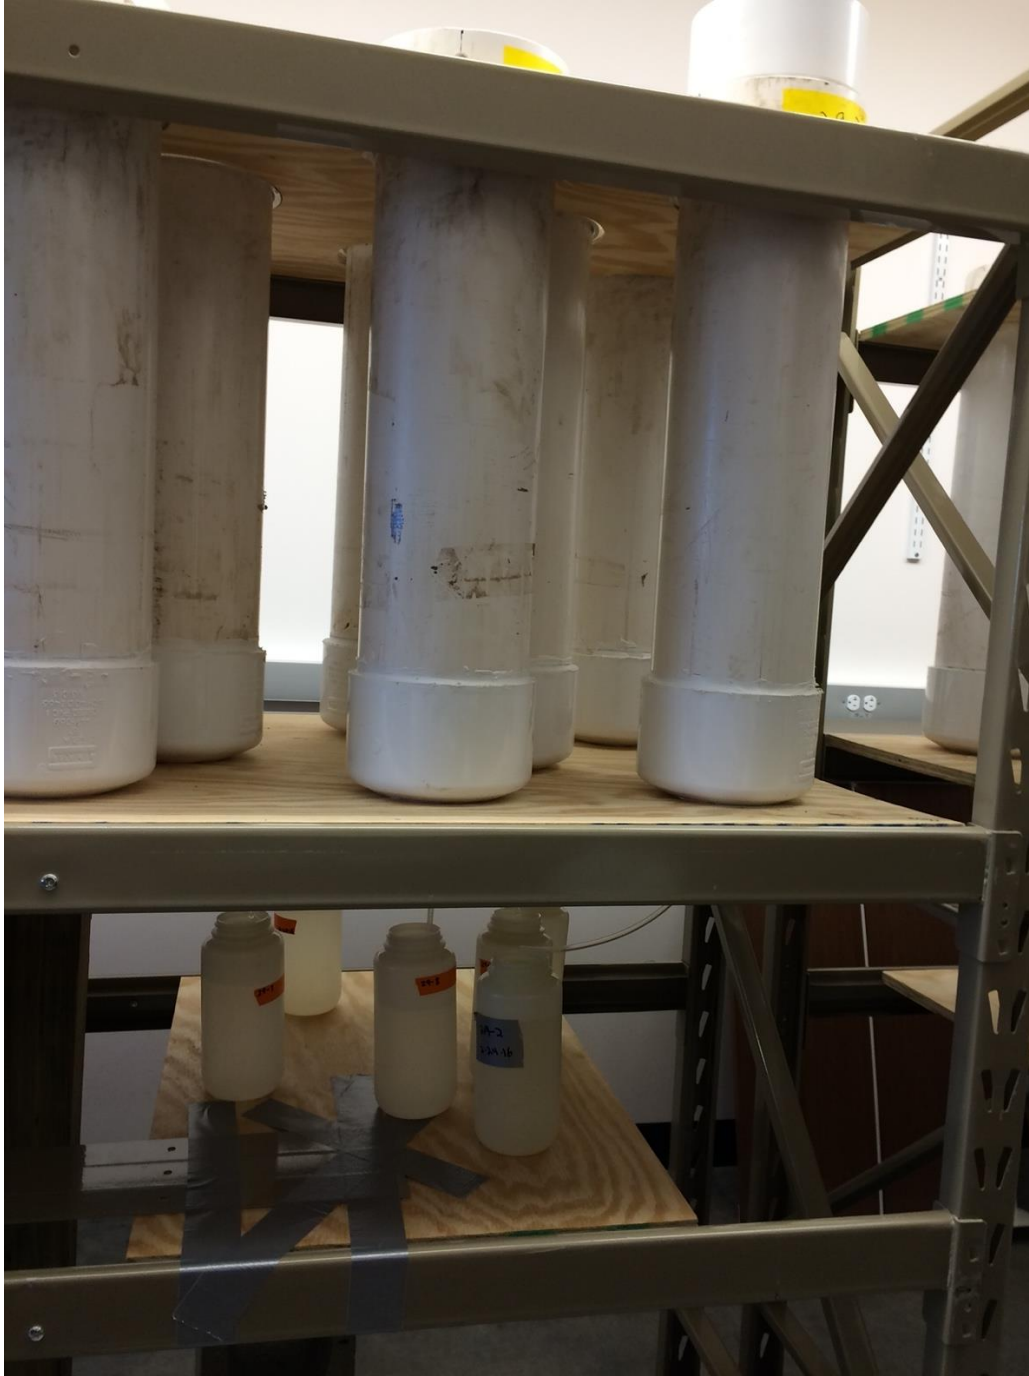

*Figure S1: Soil column setup illustrating end caps with drainage tubes.*

*Table S1 – Primer sequences used in this study. Primers were primarily obtained from Stedtfeld et al. (FEMS Microbiol Ecol **2018**, 94 (9)) except for the 16s\_Eub primers (López-Gutiérrez et al., 2004), 16S\_1055yF (Dionisi et al. Appl Environ Microbiol. 2003 Nov;69(11):6597-604), 16s\_1392\_R (Ritalahti et al. Appl Environ Microbiol. 2006 Apr;72(4):2765-74) and tet36, tet33 primers that were developed in-house for our purposes.*

| Name                 | Sequence                        | Tm (°C) |
|----------------------|---------------------------------|---------|
| aadA9_F              | CGCGGCAAGCCTATCTTG              | 57      |
| aadA9_R              | CAAATCAGCGACCGCAGACT            | 58      |
| ant6-ia_F            | TCGCCATGAGCTGCTGA               | 57      |
| ant6-ia_R            | CCTATCATACTCCGGATAGGCATA        | 55      |
| ant6-ib_F            | AGAACATCCGACAGCACGTTTC          | 58      |
| ant6-ib_R            | CCAACCTTCCATGAAATCATTCGC        | 57      |
| aph(3'')-ia_F        | TAACAGCGATCGCGTATTTTCG          | 55      |
| aph(3'')-ia_R        | TCCGACTCGTCCAACATCAATA          | 56      |
| erm(35)_F            | CCTTCAGTCAGAACCGGCAA            | 58      |
| erm(35)_R            | GCTGATTTGACAGTTGGTGGTG          | 57      |
| erm(B)_F             | GAACACTAGGGTTGTTCTTGCA          | 55      |
| erm(B)_R             | CTGGAACATCTGTGGTATGGC           | 56      |
| erm(C)_F             | TTTGAAATCGGCTCAGGAAAA           | 53      |
| erm(C)_R             | ATGGTCTATTTCAATGGCAGTTACG       | 55      |
| erm(F)_F             | TCTGATGCCCCGAAATGTTCAAG         | 56      |
| erm(F)_R             | TGAAGGACAATTGAACCTCCCA          | 56      |
| ermA/ermTR_F         | ACATTTTACCAAGGAACTTGTTGAA       | 55      |
| ermA/ermTR_R         | GTGGCATGACATAAACCTTCATCA        | 56      |
| ermT_F               | GTTCACTAGCACTATTTTAAATGACAGAAGT | 56      |
| ermT_R               | GAAGGGTGTCTTTTTAATACAATTAACGA   | 54      |
| ermX_F               | GCTCAGTGGTCCCCATGGT             | 60      |
| ermX_R               | ATCCCCCGTCAACGTTT               | 57      |
| IncP_oriT_F          | CAGCCTCGCAGAGCAGGAT             | 60      |
| IncP_oriT_R          | CAGCCGGGCAGGATAGGTGAAGT         | 63      |
| int1-a-marko_F       | CGAAGTCGAGGCATTTCTGTC           | 56      |
| int1-a-marko_R       | GCCTTCCAGAAAACCGAGGA            | 57      |
| intl1F165_clinical_F | CGAACGAGTGGCGGAGGGTG            | 63      |
| intl1F165_clinical_R | TACCCGAGAGCTTGGCACCCA           | 63      |
| intl2_F              | TGCTTTTCCCACCCTTACC             | 55      |
| intl2_R              | GACGGCTACCCTCTGTTATCTC          | 56      |
| intl3_F              | CAGGTGCTGGGCATGGA               | 58      |
| intl3_R              | CCTGGGCAGCATCACCA               | 58      |

|            |                                |    |
|------------|--------------------------------|----|
| IS26_F     | ATGGATGAAACCTACGTGAAGGTC       | 57 |
| IS26_R     | CGGTACTTAATCTGTGGTGTTCA        | 57 |
| IS6100_F   | CGCACC GGCTTGATCAGTA           | 58 |
| IS6100_R   | CTGCCACGCTCAATACCGA            | 58 |
| Inu(F)_F   | ATACCGGTCATTTCCACTTGGC         | 58 |
| Inu(F)_R   | GCATCAGGCTGATGAGGTTCAA         | 58 |
| InuA_F     | TGACGCTCAACACACTCAAAAA         | 55 |
| InuA_R     | TTCATGCTTAAGTTCCATACGTGAA      | 55 |
| InuC_F     | GGGTGTAGATGCTCTTCTTGGA         | 56 |
| InuC_R     | CTTTACCCGAAAGAGTTTCTACCG       | 55 |
| mef(B)_F   | CCGATAGGCTTACTTGTTGCAG         | 56 |
| mef(B)_R   | AGTCCA CTGCGTTTCATTG           | 56 |
| mefA_F     | TAATTATCGCAGCAGCTGGTTC         | 55 |
| mefA_R     | GTTCCCAAACGGAGTATAAGAGTG       | 55 |
| sat4_F     | GAATGGGCAAAGCATAAAAACTTG       | 54 |
| sat4_R     | CCGATTTTGAAACCACAATTATGATA     | 52 |
| strA_F     | CCGGTGGCATT TGAGAAAAA          | 54 |
| strA_R     | GTGGCTCAACCTGCGAAAAG           | 57 |
| strB_F     | GCTCGGTCGTGAGAACAATCT          | 57 |
| strB_R     | CAATTCGGTCGCCTGGTAGT           | 57 |
| sul1 NEW_F | GCCGATGAGATCAGACGTATTG         | 55 |
| sul1 NEW_R | CGCATAGCGCTGGGTTTC             | 57 |
| sul2_F     | TCATCTGCCAAACTCGTCGTTA         | 56 |
| sul2_R     | GTCAAAGAACGCCGAATGT            | 57 |
| tet(32)_F  | CCATTACTTCGGACAACGGTAGA        | 56 |
| tet(32)_R  | CAATCTCTGTGAGGGCATTTAACA       | 55 |
| tet(36)_F  | AGAATACTCAGCAGAGGTCAGTTCCT     | 59 |
| tet(36)_R  | TGGTAGGTCGATAACCCGAAAAT        | 56 |
| tet44_F    | CTCATGTAGATGCAGGAAAGACG        | 55 |
| tet44_R    | GTAAGTCTGCCTGAATTGTGA          | 56 |
| tetA_F     | CTCACCAGCCTGACCTCGAT           | 59 |
| tetA_R     | CACGTTGTTATAGAAGCCGCATAG       | 56 |
| tetbP_F    | TGGGCGACAGTAGGCTTAGAA          | 58 |
| tetbP_R    | TGACCCTACTGAAACATTAGAAATATACCT | 56 |
| tetG_F_F   | TCGCGTTCCTGCTTGCC              | 59 |
| tetG_F_R   | CCGCGAGCGACAAACCA              | 59 |
| tetH_F     | TTTGGGTCATCTTACCAGCATTAA       | 55 |
| tetH_R     | TTGCGCATTATCATCGACAGA          | 55 |
| tetL_F     | ATGTTGTAGTTGCGCGCTATAT         | 57 |
| tetL_R     | ATCGCTGGACCGACTCCTT            | 58 |

|                 |                                |    |
|-----------------|--------------------------------|----|
| tetM_F          | GGAGCGATTACAGAATTAGGAAGC       | 56 |
| tetM_R          | TCCATATGTCCTGGCGTGTCT          | 57 |
| tetO_F          | CAACATTAACGGAAAGTTTATTGTATACCA | 54 |
| tetO_R          | TTGACGCTCCAAATTCATTGTATC       | 54 |
| tetQ_F          | CGCCTCAGAAGTAAGTTCATACACTAAG   | 57 |
| tetQ_R          | TCGTTTCATGCGGATATTATCAGAAT     | 54 |
| tetT_F          | CCATATAGAGGTTCCACCAAATCC       | 55 |
| tetT_R          | TGACCTATTGGTAGTGGTTCTATTG      | 56 |
| tetW_F          | ATGAACATTCCCACGTTATCTTT        | 55 |
| tetW_R          | ATATCGGCGGAGAGCTTATCC          | 56 |
| tetX_F          | AAATTTGTTACCGACACGGAAGTT       | 55 |
| tetX_R          | CATAGCTGAAAAAATCCAGGACAGTT     | 56 |
| tet33_241_388_F | TGCTTGTTTCCCTGGCCG             | 54 |
| tet33_241_388_R | GCGTGATGTCGGCGATCA             | 55 |
| 16S_Eub_338_F   | ACTCCTACGGGAGGCAGCAG           | 58 |
| 16S_Eub_518_R   | ATTACGCGGCTGCTGG               | 54 |
| 16S_1055yF      | ATGGTTGTCGTCAGCT               | 45 |
| 16S_1392R       | ACGGGCGGTGTGTAC                | 47 |

*Table S2 – Samples pooled to create interplate calibrator samples. The concentration of this calibrator sample was 11.04 ng/ul.*

| Pooled Sample ID    | Manure Type | Treatment | Matrix | Day |
|---------------------|-------------|-----------|--------|-----|
| A224Pman1           | Swine       | Manure    | Manure | 0   |
| A792-794BManS17C01  | Beef        | Manure    | Soil   | 17  |
| A797-799BManS17C02  | Beef        | Manure    | Soil   | 17  |
| A193-195BCoR33C01   | Beef        | Control   | Water  | 33  |
| A246-248BManR33C09  | Beef        | Manure    | Water  | 33  |
| A300-302PCoR61C10   | Swine       | Control   | Water  | 61  |
| A522-524BManR110C09 | Beef        | Manure    | Water  | 110 |
| A598-600PCoR138C10  | Swine       | Control   | Water  | 138 |
| A568-570BManR138C03 | Beef        | Manure    | Water  | 138 |
| A902-904PCoS145C04  | Swine       | Control   | Soil   | 145 |

*Table S3 – Standard sequences for each primer set with amplification efficiencies and limits of detection*

| Primer Name | Standard Length (bp) | Limit of Detection (copies/gram of soil of mL of water) | R2         | Efficiency (%) | Standard Sequence                                                                                                                                                                                                                                                                                                                                          |
|-------------|----------------------|---------------------------------------------------------|------------|----------------|------------------------------------------------------------------------------------------------------------------------------------------------------------------------------------------------------------------------------------------------------------------------------------------------------------------------------------------------------------|
| 16S_Eub_338 | 257                  | 24                                                      | 0.9<br>981 | 126            | ACTGTCAAGCTTAGCCAATACTGGTTGAGGACTC<br>CTACGGGAGGCAGCAGTAGGGAATCTTCCACAA<br>TGGACGAAAGTCTGATGGAGCAACGCCGCGTGA<br>GTGAAGAAGGGTTTCGGCTCGTAAACTCTGTTG<br>TTAAAGAAGAACATATCTGAGAGTAACTGTTTCA<br>GTATTGACGGTATTTAACCAGAAAGCCACGGCTA<br>ACTACGTGCCAGCAGCCGCGGTAATTCCTTCTTC<br>ACAATCAGAAGCTTACTGTC                                                                |
| aadA9       | 251                  | 24                                                      | 0.9<br>942 | 132            | ACTGTCAAGCTTATGTGGCCGCCGAATGGGTTTT<br>AGAGCGCTTGCCAGCTGAGCATAAGCCAATACT<br>GGTTGAGGCGCGGCAAGCCTATCTTGGGCTTTGC<br>AAGGATAGTCTTGCTTTGCGTGCAGATGAGACTT<br>CGGCGTTTATTGGCTATGCAAAGTCTGCGGTGCG<br>TGATTTGCTCGAAAAGCGAAAATCTCAAATTCG<br>CATATTTGCGATGGCGCCAAGAACGTCTAACGTG<br>ATAAGCTTACTGTC                                                                     |
| ant6-ia     | 313                  | 20                                                      | 0.9<br>925 | 109            | ACTGTCAAGCTTAGCCAATACTGGTTGAGGTGCGC<br>CATGAGCTGCTGAGAATGATATCATGGAAGGTC<br>GGCATCGAAACAGGCTTTAAATTAAGTGTAGGC<br>AAGAACTATAAGTTTATTGAAAGGTATATATCCG<br>AGGATTTGTGGGAGAACTTTTGTCCACCTACCG<br>GATGGATTCTATGAAAACATATGGGAAGCATT<br>TTTCTATGCCATCAATTGTTGAGGGCGGTATCCG<br>GTGAGGTGGCGGAAAGGCTTCATTATGCCTATCC<br>GGAGTATGATAGGTCTTCTTCAACAATCAGAAG<br>CTTACTGTC |
| ant6-ib     | 251                  | 24                                                      | 0.9<br>975 | 110            | ACTGTCAAGCTTTACCAGTACCTACAGATGAAGA<br>TTATTATATAGAACATCCGACAGCACGTTCTTTTG<br>ATGATTGCTGTAATGAATTTTGAATACTGTAAC<br>ATATGTAGTGAAAGGATTATGTCGAAAGGAAAT<br>TTTATTTGCAATCGACCATTTAAATAATATTGTGC<br>GTATGGAATTACTGCGAATGATTTTCATGGAAGGT<br>TGGAATAGAGCAAGGTTATAGTTTTAGTCTAGGA<br>AAGCTTACTGTC                                                                    |
| aph(3'')-ia | 301                  | 20                                                      | 0.9<br>971 | 112            | ACTGTCAAGCTTAGCCAATACTGGTTGAGGTAAC<br>AGCGATCGCGTATTTCTGCTCGCTCAGGCGCAAT<br>CACGAATGAATAACGGTTTGGTTGATGCGAGTG<br>ATTTTGATGACGAGCGTAATGGCTGGCCTGTTGA<br>ACAAGTCTGGAAAGAAATGCATAAACTTTTGCCA<br>TTCTCACCAGGATTCAGTCGTCATCATGGTGATTT<br>CTCACTTGATAACCTTATTTTACGAGGGGAAA<br>TTAATAGGTTGTATTGATGTTGGACGAGTCGGAT<br>CCTTCTTCAACAATCAGAAGCTTACTGTC                |

|            |     |    |            |     |                                                                                                                                                                                                                                                                                           |
|------------|-----|----|------------|-----|-------------------------------------------------------------------------------------------------------------------------------------------------------------------------------------------------------------------------------------------------------------------------------------------|
| erm(35)    | 251 | 24 | 0.9<br>858 | 136 | ACTGTCAAGCTTATGTTTGAAAATGTCGAATATTT<br>TCTATGCGGTTCAATTATCCTTCAGTCAGAACCG<br>GCAAAAAAATTGTTTTCAAGTAAGGTTTATAACC<br>CATTGACAGTACTTTATCATACCTATTATGATTTG<br>AAATTCCTGTATGAGATAAATCCTGAAAGTTTTT<br>GCCACCACCAACTGTCAAATCAGCACTTTTGAGA<br>ATTGAAAGAAAACAGATTCATTAGATATTGGAA<br>GCTTACTGTC     |
| erm(B)     | 251 | 24 | 0.9<br>970 | 118 | ACTGTCAAGCTTTTGACCCATTTTGAAACAAAGT<br>ACGTATATAGCTTCCAATATTTATCTGGAACATCT<br>GTGGTATGGCGGGTAAGTTTTATTAAGACACTGT<br>TTACTTTTGGTTTAGGATGAAAGCATTCCGCTGG<br>CAGCTTAAGCAATTGCTGAATCGAGACTTGAGTG<br>TGCAAGAACAACCCTAGTGTTCCGGTGAATATCCA<br>AGGTACGCTTGTAAGAATCCTTCTTCAACAATCAG<br>AAGCTTACTGTC |
| erm(C)     | 251 | 24 | 0.9<br>938 | 152 | ACTGTCAAGCTTATAATGACAAATATAAGATTAA<br>ATGAACATGATAATATCTTTGAAATCGGCTCAGG<br>AAAAGGGCATTTTACCCTTGAATTAGTACAGAGG<br>TGTAATTCGTAACCTGCCATTGAAATAGACCATA<br>AATTATGCAAACTACAGAAAATAAACTTGTTGA<br>TCACGATAATTTCCAAGTTTTAAACAAGGATATAT<br>TGCAGTTTAAATTTCTAAAAACCAATCCTATAAA<br>AGCTTACTGTC     |
| erm(F)     | 251 | 24 | 0.9<br>987 | 116 | ACTGTCAAGCTTCTTTGGTTGAACATTTACGAAA<br>ATTATTTTCTGATGCCCGAAATGTTCAAGTTGTCG<br>GTTGTGATTTTAGGAATTTTGCAGTTCGGAAATTT<br>CCTTTCAAAGTGGTGTCAAATATTCCTTATGGCAT<br>TACTTCCGATATTTTCAAAATCCTGATGTTTGAGA<br>GTCTTGAAAATTTTCTGGGAGGTTCAATTGTCCTT<br>CAGTTAGAACCTACACAAAAGTTATTTTCGAAGC<br>TTACTGTC   |
| ermA/ermTR | 251 | 24 | 0.9<br>914 | 133 | ACTGTCAAGCTTGCATGTAAAGGAAATATTAATA<br>TATACGAATATCAATAAACAAGATAAAATAATAG<br>AAATTGGGTCAGGAAAAGGACATTTTACCAAGG<br>AACTTGTGGAAATGAGTCAACGGGTGAATGCTA<br>TAGAGATTGATGAAGGTTTATGTCATGCCACGAA<br>AAAAGCAGTTGAACCTTTTCAGAATATAAAAGTT<br>ATTCATGAGGATATTTGAAGTTTAGCTTTCCTAA<br>AAAAGCTTACTGTC    |
| ermT       | 251 | 21 | 0.9<br>977 | 124 | ACTGTCAAGCTTCCATTTTATAACAAAATTTTCAT<br>ATTGTTTTCTATCTTTGAGTGATATTTTGAAGGG<br>TGTCTTTTAAATAACAATTAACGAGCTATTAACCT<br>AGGTTTTGGATGAAAGTATTCTCTAGGGATTTTA<br>CTTAATATGGATATATCAACTTCTGTCATTAAAAA<br>TAGTGCTAGTGAACGATTTGTATTTAGCAACCTTT<br>TAGCAAATCCATATTCCACTATTAAATAACAAGCT<br>TACTGTC    |

|        |     |    |            |     |                                                                                                                                                                                                                                                                                                                                                                         |
|--------|-----|----|------------|-----|-------------------------------------------------------------------------------------------------------------------------------------------------------------------------------------------------------------------------------------------------------------------------------------------------------------------------------------------------------------------------|
| ermX   | 251 | 24 | 0.9<br>985 | 116 | ACTGTCAAGCTTACCATCGCCTGAAAGGCTTTGC<br>GCTGTTCTATCGGAATCTTCGGGTCACCCACCCG<br>GCGGATCACTAAGATCCCCCGTCAACGTTTGGC<br>TGTGGCCGAAAGCAGTCCTTGGTACCCGAGAA<br>CCCAGGTGAAATGTGAACCATGGGGACCACTGA<br>GCCGTCATCATCGTGCTTGCGCCTACCCGGCCC<br>GGCGGCGAGCGACTTCCCCTGCATGAGGAGTA<br>CAGCAAGCTTACTGTC                                                                                     |
| lnu(F) | 251 | 24 | 0.9<br>963 | 140 | ACTGTCAAGCTTCGATTTAAAAGATTGGCCCCAA<br>AGAGCATCAGGCTGATGAGGTTCAACACAAGCC<br>CTTCCACCAGCGGCGCGCTTCACGTATCGGGGG<br>ATCGCCACGAGAGCGCTTGCATACCTTGACAAC<br>TCTCTGATCGGTCCAACAAAACAGCCGCCTCAA<br>GCGAGGGAAACCACCCATAGCCTTGCCAAGTGG<br>AAATGACCGGTATGTCCGATTTTCGCATGAAATG<br>GAAAAGCTTACTGTC                                                                                    |
| lnuA   | 251 | 24 | 0.9<br>960 | 114 | ACTGTCAAGCTTTTGCTTGGGTAATTGATCCATCA<br>TCATTTAGATTTATAGGATGAATATCTAAATACCC<br>ATATTCTTCATGCTTAAGTTCATACGTGAAGGCA<br>TCCAATCAACTTCTATTTTATATCCGATATCTTCTA<br>ATTTTGTATAACTTTTTGAGTGTGTTGAGCGTCA<br>AAATCTATATCTATATCTCTGTGTTCTTTGTTGT<br>TTTCCAGTTAATACATCTACCCCCAGAAGCTTAC<br>TGTC                                                                                      |
| lnuC   | 326 | 19 | 0.9<br>895 | 117 | ACTGTCAAGCTTAGCCAATACTGGTTGAGGGGGT<br>GTAGATGCTCTTCTTGATATCAGTCAAGAGCCC<br>ATAATGATATTGACATTTTTGTAGAAAAGAACGA<br>TTATCAGAACTTTATAGAAATAATGAAAGCTAAT<br>GGCTTTTATGAGATTAAGATGGAATATACAACAT<br>TGAACCATACTGTATGGGAAGATTTGAAAAACA<br>GAATTATTGATTTGCATTGTTTGAATATACGGAC<br>GAAGGTGAAATTCCTTATGATGGGGATTGTTTTC<br>CGGTAGAAACTCTTCGGGTAAAGTCCTTCTTCA<br>ACAATCAGAAGCTTACTGTC |
| mef(B) | 251 | 24 | 0.9<br>974 | 108 | ACTGTCAAGCTTGTTTTCCCTTTTGATGACCGCCA<br>TGACTCTTCTATGCCGATAGGCTTACTTGTGCA<br>GGTCCGGTTGTTGAGGTTATAGGTGTTAATACAT<br>GGTTTTCTGGTCTGGTGTTCGTTGATAGTAAA<br>CGCTGTTCTCTGCCGATTCTGACACGACGCTAT<br>GACAAAAGTAACAATGAAACCGCAAGTGGACTGA<br>AAAAAGGACCGGTTGATGATAATTTGTAGTGG<br>TAAGCTTACTGTC                                                                                      |
| mefA   | 315 | 19 | 0.9<br>971 | 140 | ACTGTCAAGCTTAGCCAATACTGGTTGAGGTAAT<br>TATCGCAGCAGCTGGTTCGGTGCTTACTATTGTT<br>GCATTCTATATGGAGCTACCTGTCTGGATGGTTA<br>TGATAGTATTGTTTATCCGTAGCATTGGAACAGC<br>TTTTACACCCCGGCTCTCAATGCGGTTACGCCAC<br>TTTGTAGTACCAGAAGAACAGCTTACGAAATGTGC<br>AGGCTATAGTCAGTCTTTCAGTCTATAAGCTAT<br>ATTGTTAGTCCGGCAGTTGCAGCACTCTTATACTC<br>CGTTTGGGAACTCCTTCTCAACAATCAGAAGCTT<br>ACTGTC           |

|         |     |    |            |     |                                                                                                                                                                                                                                                                                          |
|---------|-----|----|------------|-----|------------------------------------------------------------------------------------------------------------------------------------------------------------------------------------------------------------------------------------------------------------------------------------------|
| sat4    | 251 | 24 | 0.9<br>927 | 113 | ACTGTCAAGCTTGTGCGAGAGTAGTGCCTGCG<br>GAGCTTCATTCCCGGTGAGCGCGTTATCAATAT<br>ATCTATAGAATGGGCAAAGCATAAAAACTTGCAT<br>GGACTAATGCTTGAAACCCAGGACAATAACCTTA<br>TAGCTTGTAATTCTATCATAATTGTGGTTTCAAA<br>ATCGGCTCCGTCGATACTATGTTATACGCCAACTT<br>TGAAAACAACTTTGAAAAAGCTGTTTTCTGGTAA<br>AGCTTACTGTC      |
| strA    | 251 | 24 | 0.9<br>985 | 133 | ACTGTCAAGCTTTTCGAATATATAAATGGCTTTTA<br>TAATCCACGCCGAAGACATTCAACACTCGGCTGG<br>AAATCGCCGGTGGCATTGAGAAAAAAGCCGCT<br>TAAAATGAGAGATAGACCGGAACACAACCGGTG<br>CAAGTCCATAGCAACTCGTTTCTTTTCGCAGGTTG<br>AGCCACCTCCGCGCTTCATCAGAAAACTGAAGGA<br>ACCTCCATTGAATCGAACTAATATTTTTTGGTGA<br>AAGCTTACTGTC    |
| strB    | 251 | 24 | 0.9<br>981 | 109 | ACTGTCAAGCTTGGAGAAGGGCAGAAGGCAGG<br>GGTTCCTCAGATGCGGCATACAGCTTCGCCATTA<br>GTTCCGCTGCAATTCGGTCGCTGGTAGTCGCC<br>GTGCTCGGCAACGATGTGAGAGAGCATTGCTC<br>CCCGGCATATTCGAGCAACATCAGATTGTTCTCA<br>CGACCGAGCAACCGGACTGCTCCCTCCCATTGC<br>GCCATACCAGATAGTCGGCCCCGCGCAGTTTCATC<br>AGCAAAGCTTACTGTC     |
| sul1    | 251 | 24 | 0.9<br>997 | 128 | ACTGTCAAGCTTGGATCAGACGTCGTGGATGTGCG<br>GACCGGCCGCCAGCCATCCGGACGCGAGGCGCTG<br>TATCGCCGGCCGATGAGATCAGACGTATTGCGCC<br>GCTCTTAGACGCCCTGTCCGATCAGATGCACCGT<br>GTTTCAATCGACAGCTTCCAACCGGAAACCCAGC<br>GCTATGCGCTCAAGCGCGGCGTGGGCTACCTGA<br>ACGATATCCAAGGATTTCTGACCCTGCGCTCTAT<br>CCAAGCTTACTGTC |
| sul2    | 251 | 24 | 0.9<br>984 | 112 | ACTGTCAAGCTTGGCCTATCTCAATGATATTGCG<br>GGTTTTCCAGACGCTGCGTTCTATCCGCAATTGG<br>CGAAATCATCTGCCAAACTCGTCGTTATGCATTG<br>GGTGCAAGACGGGCAGGCAGATCGGCGCGAGG<br>CACCCGCTGGCGACATCATGGATCACATTGCGGC<br>GTTCTTTGACGCGCGCATCGCGGCGCTGACGGGT<br>GCCGGTATCAAACGCAACCGCCTTGTCTTGATC<br>CCGAAGCTTACTGTC   |
| tet(32) | 251 | 24 | 0.9<br>920 | 123 | ACTGTCAAGCTTACTTTTCCCAAAAAAGATAATAT<br>AATCTCATGTGTAACAGTATCAATGTCAAAATGC<br>AAAAGAGGGTCTGTATCAGCAATCTCTGTGAGG<br>GCATTTAACAGGGCTTCCCTTTGCTCCGGCTTTTG<br>CGGCTCTACCGTTGTCCGAAGTAATGGCATGGGA<br>TTATCAATCCGTGTTTTGTGAGGCAGGAGTTTTTC<br>ATTTCCAGAATGTCGTTCAAGTTTCAAAGTATCAA<br>GCTTACTGTC  |



|         |     |    |            |     |                                                                                                                                                                                                                                                                                                                                                      |
|---------|-----|----|------------|-----|------------------------------------------------------------------------------------------------------------------------------------------------------------------------------------------------------------------------------------------------------------------------------------------------------------------------------------------------------|
| tet(33) | 251 | 24 | 0.9<br>901 | 96  | ACTGTCAAGCTTGCACTGAGTAAACCGAAACGCT<br>TGGCGCGCTGGTGGGGTGGCGTGATGTCGGCGA<br>TCACGGTGGCGGTGACCGCATTGGTCGCTCCGGT<br>TATCCCAGCCACTGCGCGGGCGATATAGAACACC<br>GACAGAGCGGACGTCGTGGCGAGCACGAGATA<br>GTCGACGGTCGCACCGGCCAGGGAAACAAGCAG<br>CACCCGGCGGGCGGCCGAATCGGTCCGACAGTGT<br>TCCCAGAAGCTTACTGTC                                                             |
| tet(36) | 251 | 24 | 0.9<br>976 | 107 | ACTGTCAAGCTTGGCGAAATATCTACTATTACTTC<br>AGATGGTGATTGGACTACTATTTTGGGTAAATATT<br>CCTTTAGATACTAGTAAAGAATACTCAGCAGAGG<br>TCAGTTCCTACACACAAGGCTTGGGCGTTTTTGT<br>ACTCGATTTTCGGGTTATCGACCTACCAACAAAA<br>AGGTAAGCAGAAGTGTAAGTGAATGAAAAAG<br>ATAAGCTGATGTATATGTTTGAGAAGGAAAGTAT<br>AAGCTTACTGTC                                                                |
| tet44   | 251 | 24 | 0.9<br>947 | 100 | ACTGTCAAGCTTTACAATATTGATTTTGTAGTCAT<br>TCCAATTAAGAAGTAACTGCTGCCTGAATTGT<br>GATTCCACGCTGACGTTCTAAAAACATAGTATCT<br>GTCCTTGTTGTTCCCTTATCTACACTGCCTAATTCT<br>AAAATCGCTCCACTTGTATAAAGCAGACTTTCCG<br>TTAAAGTCGCTTTCTGCATCTACATGAGCAAG<br>AATACCAATGTTGATTATTTTCATGGAATTTCAAG<br>CTTACTGTC                                                                  |
| tetA    | 251 | 24 | 0.9<br>963 | 113 | ACTGTCAAGCTTCCGCTCCAAAGCCCGCGACGCA<br>GCGCCGGCAGGCAGAGCAAGTAGAGGGCAGCG<br>CCTGCAATCCATGCCACCCGTTCCACGTTGTTAT<br>AGAAGCCGCATAGATCGCCGTGAAGAGGAGGG<br>GTCCGACGATCGAGGTCAGGCTGGTGAGCGCCG<br>CCAGTGAGCCTTGACGCTGCCCCTGACGTTCTC<br>ATCCACCTGCCTGGACAACATTGCTTGACGCGCC<br>GGCATAAGCTTACTGTC                                                                |
| tetbP   | 251 | 24 | 0.9<br>962 | 119 | ACTGTCAAGCTTGACTATCTATAAGGAAACACCT<br>AAAGGTTTTGGAGCGTCAATAATGCATATGCAG<br>GAAGACTTAAATCCATTTTGGGCGACAGTAGGCT<br>TAGAAATAGAACCAGCAGGGAGAGGCGAAGGT<br>CTTAGGTATATTCTAATGTTTCAGTAGGGTCATT<br>GCCAAAATCTTTCAAAATGCAATTGAAGAAGCA<br>GTTATTAAGACAAGTAAACAAGGATTATTTGGAT<br>GGGAAGCTTACTGTC                                                                |
| tetG    | 306 | 20 | 0.9<br>974 | 102 | ACTGTCAAGCTTAGCCAATACTGGTTGAGGCCGC<br>GAGCGACAAACCAACGGTCGCGGTGTTCCACTG<br>AAAACGGTCCTCGCCATATATGACCCATAGGGCT<br>GCAGGCACTTGCCGATCAGTTGAATAATGAAG<br>AAAACGCGAAAAGCGCACCTAGCCCGCGCAAT<br>GCATCATCCAGCCGTAACAGAACGAATGGTTTGA<br>TGCGAACCGGCTTTCCGGTCCCGCCATGGCTGTG<br>ATGAGTCTCCTTGAGGAAAATGCAGGCAAGCAG<br>GAACGCGATCCTTCTTCAACAATCAGAAGCTTAC<br>TGTC |

|      |     |    |            |     |                                                                                                                                                                                                                                                                                          |
|------|-----|----|------------|-----|------------------------------------------------------------------------------------------------------------------------------------------------------------------------------------------------------------------------------------------------------------------------------------------|
| tetH | 251 | 24 | 0.9<br>943 | 110 | ACTGTCAAGCTTTAAAAGGGGACCAATGATCCCG<br>GTAATATTGGTTAGGCTCACCAGAGTACCTTGTA<br>ATTTCCCTTGCGCATTATCATCGACAGATTTTGAT<br>AAATAACCTTGTAATGCGGGTTGCCCCATACCTC<br>CTGCCGCTAAGCAAATTAATGCTGGTAAGATGAC<br>CCAAACGTGGCCTATCCACGCTAATAATAAACAG<br>CCCATCATATCAATAGACATACTGATCATAATGG<br>AAGCTTACTGTC  |
| tetL | 251 | 24 | 0.9<br>989 | 108 | ACTGTCAAGCTTTCCTTACTTATTATGGCTCGTTT<br>TATTCAAGGGGCTGGTGCAGCTGCATTTCCAGCA<br>CTCGTAATGGTTGTAGTTGCGCGCTATATTCCAA<br>AGGAAAAAGGGGTAAAGCATTTGGTCTTATTG<br>GATCGATAGTAGCCATGGGAGAAGGAGTCGGTC<br>CAGCGATTGGTGGAATGATAGCCATTATATTCA<br>TTGGTCCTATCTTCTACTCATTCTATGATAACAA<br>TAAGCTTACTGTC     |
| tetM | 251 | 24 | 0.9<br>957 | 116 | ACTGTCAAGCTTAACTACCTTAACAGAAAGCTT<br>ATTATATAACAGTGGAGCGATTACAGAATTAGGA<br>AGCGTGGACAAAGGTACAACGAGGACGGATAAT<br>ACGCTTTTAGAACGTCAGAGAGGAATTACAATTC<br>AGACAGGAATAACCTCTTTTCAGTGGGAAAATAC<br>GAAGGTGAACATCATAGACACGCCAGGACATAT<br>GGATTTCTTAGCAGAAGTATATCGTTCATTATCA<br>GTTAAGCTTACTGTC   |
| tetO | 251 | 24 | 0.9<br>982 | 110 | ACTGTCAAGCTTGGAGTAAAATTACATGAAAATA<br>ATTAAGCTTAGGCATTCTGGCTCACGTTGACGCAG<br>GAAAGACAACATTAACGGAAGTTTATTGTATAC<br>CAGTGGTGCAATTGCAGAACTAGGGAGCGTAGA<br>TGAAGGCACAACAAGGACAGATACAATGAATTT<br>GGAGCGTCAAAGGGGAATCACTATCCAGACAGC<br>AGTGACATCTTTTCAGTGGGAGGATGTAAAAGTC<br>AACAAAGCTTACTGTC  |
| tetQ | 251 | 24 | 0.9<br>985 | 126 | ACTGTCAAGCTTTTGCAATAATGAGTGGTGTGTCAT<br>ATTAAAGGGAAAGTTCCATTAAATACAAGTAAAG<br>ACTACGCCTCAGAAGTAAGTTCATACACTAAGGG<br>CTTAGGCGTTTTTATGGTCAAGCCATGCGGGTAT<br>CAAATAACAAAAGGCGATTATTCTGATAATATCC<br>GCATGAACGAAAAAGATAAACTTTTATTCATGTT<br>CCAAAAATCAATGTCATCAAATAATGGAGCGGT<br>CAAGCTTACTGTC |
| tetT | 251 | 24 | 0.9<br>972 | 115 | ACTGTCAAGCTTTACAAAATAGATGCTAGATTTG<br>GTGAATTGAAAACAATATATAAAGAACGACCTAA<br>GAGAACTCTAAAGCAGTAATCCATATAGAGGTT<br>CCACCAAATCCTTATTGGGCATCTATTGGACTGTC<br>AATAGAACCACTACCAATAGGGTCAGGATTATTA<br>TATAAGACAGAGGTGTCCTATGGATATTTAAATA<br>ATTCAATTTCAAATGCAGTAAAGATGCTGTAGA<br>AAGCTTACTGTC    |

|      |     |    |            |     |                                                                                                                                                                                                                                                                                          |
|------|-----|----|------------|-----|------------------------------------------------------------------------------------------------------------------------------------------------------------------------------------------------------------------------------------------------------------------------------------------|
| tetW | 251 | 24 | 0.9<br>895 | 122 | ACTGTCAAGCTTTCTATGTCGGTATTTTCCTCCAG<br>GACTATTTCCGGGGACAGCGACACCGTCTGCTTG<br>ATGATAATATCGGCGGAGAGCTTATCCCGAACA<br>GACTGAACCACGCTCTGCAAAATCAACGCCAGCCT<br>GGTCGATCTTGTTGATAAAGATAACGGTGGGAA<br>TGTTCATTTTCCGCAGGGCATGGAACAGAATACG<br>GGTCTGGGCCTGCACGCCATCTTTAGCGGAGATC<br>ACAAGCTTACTGTC |
| tetX | 251 | 24 | 0.9<br>988 | 108 | ACTGTCAAGCTTTTATTATTAGGATTCGAAATAA<br>TAAATTACCTTGATGAGCAGCCATTAGCCGGTTT<br>CCATTGCATAGCTGAAAAAATCCAGGACAGTTCA<br>CCTCTGGATGATGAATATCGGCTTGATATTGAA<br>AGTACCTGTTTCTTCAACTCCGTGTCGGTAACAA<br>ATTTTCTTACTTTAGACATTCCACCATTGGCAATA<br>ATAACCAGATCTGCTGTTTCACTCGGTTTATTAAG<br>CTTACTGTC     |

*Table S4 – Number of biological and technical replicates for each sample type; total replicates in data output.*

| Sample Type      | Day | Biological Replicates | Technical Replicates | Total Replicates |
|------------------|-----|-----------------------|----------------------|------------------|
| Manure           | 0   | 1                     | 6                    | 6                |
| Manured soil     | 0   | 6                     | 2                    | 12               |
| Manured effluent | 11  | 6                     | 2                    | 12               |
| Manured soil     | 17  | 3                     | 2                    | 6                |
| Manured effluent | 33  | 6                     | 2                    | 12               |
| Manured effluent | 61  | 6                     | 2                    | 12               |
| Manured effluent | 82  | 6                     | 2                    | 12               |
| Manured soil     | 89  | 3                     | 2                    | 6                |
| Manured effluent | 110 | 6                     | 2                    | 12               |
| Manured effluent | 138 | 6                     | 2                    | 12               |
| Manured soil     | 145 | 3                     | 2                    | 6                |

A



*Figure S2 – Taxa distribution of A) source manures at phylum level with swine dominated phyla on the positive y-axis and beef dominant phyla on the negative y-axis B) Proteobacteria within source manures at the Order level and C) top families from soil columns on day 0. For figure 5A, positive fold change is increased in swine manure while negative fold change is increased in beef manure.*

*Table S5 – ANCOM-BC analysis of effluent water from swine treated columns on phyla level taxa abundance over time. The effect of day was modeled using a cubic smoothing spline fit with day as a numeric factor and day-treatment as an interaction effect. Note that there is no day 0 for water treatment therefore the impact of manure decreases throughout the model (from day 11 onward). Only phyla with a minimum interaction p-value below 0.05 are included here.*

| Phylum              | Treatment Manure | Intercept 1 | Intercept 2 | TreatmentManure :Intercept1 | TreatmentManure :Intercept2 | min interaction p-val |
|---------------------|------------------|-------------|-------------|-----------------------------|-----------------------------|-----------------------|
| PAUC34f             | 1                | 0           | 0           | 0                           | 0                           | 0.00E+00              |
| Deinococcus-Thermus | 8.52E-80         | 0.02577422  | 0.01911378  | 8.23E-22                    | 1                           | 8.23E-22              |
| Tenericutes         | 2.10E-19         | 0.50005738  | 0.001990615 | 4.60E-15                    | 1                           | 4.60E-15              |
| Bacteroidetes       | 1.11E-21         | 1           | 1           | 2.78E-06                    | 1                           | 2.78E-06              |
| Firmicutes          | 1.82E-08         | 0.019807551 | 0.00031526  | 0.000784008                 | 1                           | 7.84E-04              |
| Acidobacteria       | 1.70E-13         | 0.003554933 | 1           | 0.001027478                 | 1                           | 1.03E-03              |
| Elusimicrobia       | 1.44E-09         | 1           | 1           | 1                           | 0.002322543                 | 2.32E-03              |
| Chloroflexi         | 1                | 1           | 3.66E-05    | 1                           | 0.003071264                 | 3.07E-03              |
| Fibrobacteres       | 0.106509985      | 0.00322436  | 0.28096722  | 0.004678007                 | 1                           | 4.68E-03              |
| Nanoarchaeaeota     | 1                | 0.004154535 | 0.37018976  | 1                           | 0.00635071                  | 6.35E-03              |
| Euryarchaeota       | 3.09E-07         | 0.382587011 | 1           | 1                           | 0.047614569                 | 4.76E-02              |

*Table S6 – ANCOM-BC analysis of soil from swine treated columns on phyla level taxa abundance over time. The effect of day was modeled using a cubic smoothing spline fit with day as a numeric factor and day-treatment as an interaction effect. Note that the model includes day 0 soil samples (prior to manure treatment).*

| Phylum          | TreatmentManure | Interaction1 | Interaction2 | TreatmentManure :1 | TreatmentManure :2 | min interaction p-val |
|-----------------|-----------------|--------------|--------------|--------------------|--------------------|-----------------------|
| Spirochaetes    | 0.041422733     | 0            | 0            | 0                  | 0                  | 0.00E+00              |
| FCPU426         | 1               | 0            | 0            | 0                  | 0                  | 0.00E+00              |
| Patescibacteria | 0.175298961     | 1            | 0.081273074  | 4.70E-08           | 0.006395614        | 4.70E-08              |
| Proteobacteria  | 0.071197795     | 0.252339743  | 1            | 1.81E-05           | 0.375233909        | 1.81E-05              |

|                    |             |             |             |             |             |          |
|--------------------|-------------|-------------|-------------|-------------|-------------|----------|
| Chlamydiae         | 1           | 1           | 1           | 1.86E-05    | 1           | 1.86E-05 |
| FBP                | 1           | 8.29E-08    | 0.816565837 | 2.08E-05    | 0.000979861 | 2.08E-05 |
| Gemmatimonadetes   | 1           | 0.010432919 | 1           | 0.000455716 | 0.375233909 | 4.56E-04 |
| Verrucomicrobia    | 1           | 1           | 1           | 1           | 0.000531525 | 5.32E-04 |
| Latescibacteria    | 1           | 0.001184832 | 0.067765976 | 1           | 0.0013258   | 1.33E-03 |
| WPS-2              | 1           | 0.003424369 | 1           | 0.004323307 | 0.050942116 | 4.32E-03 |
| Rokubacteria       | 0.678048083 | 0.016159741 | 1           | 1           | 0.010482981 | 1.05E-02 |
| Thaumarchaeota     | 1           | 1           | 1           | 1           | 0.036654421 | 3.67E-02 |
| Elusimicrobia      | 1           | 1           | 1           | 1           | 0.050942116 | 5.09E-02 |
| Tenericutes        | 1           | 1           | 0.193016652 | 0.18842715  | 1           | 1.88E-01 |
| Planctomycetes     | 1           | 1           | 1           | 0.210789292 | 1           | 2.11E-01 |
| Euryarchaeota      | 0.019005776 | 0.153990273 | 1           | 1           | 0.296997565 | 2.97E-01 |
| Bacteroidetes      | 0.111460012 | 0.396949924 | 1           | 0.309430892 | 1           | 3.09E-01 |
| Actinobacteria     | 0.776104714 | 1           | 1           | 0.325694466 | 1           | 3.26E-01 |
| Fibrobacteres      | 1           | 0.66411432  | 0.458772809 | 1           | 0.362760983 | 3.63E-01 |
| Cyanobacteria      | 1           | 0.394472212 | 0.134150166 | 1           | 0.462556875 | 4.63E-01 |
| Hydrogenedentes    | 1           | 0.163015179 | 1           | 0.573662926 | 1           | 5.74E-01 |
| Chloroflexi        | 1           | 1           | 1           | 1           | 0.578579798 | 5.79E-01 |
| WS2                | 0.678048083 | 0.005425976 | 0.24119559  | 1           | 0.578579798 | 5.79E-01 |
| Nanoarchaeaeota    | 1           | 1           | 1           | 1           | 0.752766718 | 7.53E-01 |
| Acidobacteria      | 1           | 1           | 1           | 1           | 1           | 1.00E+00 |
| Firmicutes         | 0.000460528 | 1           | 1           | 1           | 1           | 1.00E+00 |
| Entothaeonellaeota | 1           | 1           | 1           | 1           | 1           | 1.00E+00 |
| Nitrospirae        | 1           | 1           | 1           | 1           | 1           | 1.00E+00 |
| Armatimonadetes    | 1           | 0.285538541 | 1           | 1           | 1           | 1.00E+00 |
| Dependentiae       | 1           | 1           | 1           | 1           | 1           | 1.00E+00 |
| Omnitrophicaeota   | 1           | 1           | 1           | 1           | 1           | 1.00E+00 |
| BRC1               | 1           | 0.66411432  | 1           | 1           | 1           | 1.00E+00 |

*Table S7 – ANCOM-BC analysis of effluent water from beef treated columns on phyla level taxa abundance over time. The effect of day was modeled using a cubic smoothing spline fit with day as a numeric factor and day-treatment as an interaction effect. Note that there is no day 0 for water treatment therefore the impact of manure decreases throughout the model (from day 11 onward). Only phyla with a minimum interaction p-value below 0.05 are included here.*

| Phylum  | TreatmentManure | Interaction1 | Interaction2 | Treatment Manure:X1 | Treatment Manure:X2 | min interaction p-val |
|---------|-----------------|--------------|--------------|---------------------|---------------------|-----------------------|
| PAUC34f | 1               | 0            | 0            | 0                   | 0                   | 0.00E+00              |

|                     |             |            |          |             |             |          |
|---------------------|-------------|------------|----------|-------------|-------------|----------|
| Deinococcus-Thermus | 8.52E-80    | 0.02577422 | 0.019114 | 8.23E-22    | 1           | 8.23E-22 |
| Tenericutes         | 2.10E-19    | 0.50005738 | 0.001991 | 4.60E-15    | 1           | 4.60E-15 |
| Bacteroidetes       | 1.11E-21    | 1          | 1        | 2.78E-06    | 1           | 2.78E-06 |
| Firmicutes          | 1.82E-08    | 0.01980755 | 0.000315 | 0.00078408  | 1           | 7.84E-04 |
| Acidobacteria       | 1.70E-13    | 0.00355493 | 1        | 0.001027478 | 1           | 1.03E-03 |
| Elusimicrobia       | 1.44E-09    | 1          | 1        | 1           | 0.002322543 | 2.32E-03 |
| Chloroflexi         | 1           | 1          | 3.66E-05 | 1           | 0.003071264 | 3.07E-03 |
| Fibrobacteres       | 0.106509985 | 0.00322436 | 0.280967 | 0.004678007 | 1           | 4.68E-03 |
| Nanoarchaeaeota     | 1           | 0.00415454 | 0.37019  | 1           | 0.00635071  | 6.35E-03 |
| Euryarchaeota       | 3.09E-07    | 0.38258701 | 1        | 1           | 0.047614569 | 4.76E-02 |
| Actinobacteria      | 0.008135353 | 0.04907734 | 1        | 0.095800762 | 1           | 9.58E-02 |
| Gemmatimonadetes    | 0.000129301 | 0.38258701 | 1        | 0.20466408  | 1           | 2.05E-01 |
| Cyanobacteria       | 0.128591472 | 1          | 0.37019  | 0.20466408  | 0.715417206 | 2.05E-01 |
| Thaumarchaeota      | 0.06815344  | 0.09360944 | 0.002052 | 1           | 0.313353823 | 3.13E-01 |
| Omnitrophicaeota    | 0.011273978 | 0.08908513 | 1        | 1           | 0.313353823 | 3.13E-01 |
| FCPU426             | 9.53E-06    | 0.10979793 | 1        | 1           | 0.313353823 | 3.13E-01 |
| Verrucomicrobia     | 3.00E-08    | 0.01244704 | 1        | 0.706763393 | 0.39047095  | 3.90E-01 |
| Lentisphaerae       | 1           | 1          | 0.068873 | 1           | 0.667723545 | 6.68E-01 |
| Spirochaetes        | 0.000236027 | 3.55E-05   | 0.001239 | 1           | 0.739631613 | 7.40E-01 |
| WPS-2               | 1           | 1          | 1        | 0.911357918 | 0.763199157 | 7.63E-01 |
| Proteobacteria      | 1           | 1.32E-07   | 0.2315   | 0.911357918 | 1           | 9.11E-01 |
| Latescibacteria     | 1           | 0.42609807 | 0.481585 | 1           | 1           | 1.00E+00 |
| Planctomycetes      | 1           | 1          | 1        | 1           | 1           | 1.00E+00 |
| Nitrospirae         | 0.844457153 | 0.38258701 | 1        | 1           | 1           | 1.00E+00 |
| Rokubacteria        | 0.09433629  | 0.39565209 | 1        | 1           | 1           | 1.00E+00 |
| Dependentiae        | 1           | 1          | 0.452535 | 1           | 1           | 1.00E+00 |
| Hydrogenedentes     | 1           | 1          | 1        | 1           | 1           | 1.00E+00 |
| Patescibacteria     | 1.01E-07    | 1          | 1        | 1           | 1           | 1.00E+00 |
| Armatimonadetes     | 0.472207119 | 0.0306566  | 1        | 1           | 1           | 1.00E+00 |
| WS2                 | 1           | 0.27776406 | 1        | 1           | 1           | 1.00E+00 |
| BRC1                | 1           | 1          | 1        | 1           | 1           | 1.00E+00 |
| Diapherotrites      | 1           | 0.01215734 | 1        | 1           | 1           | 1.00E+00 |

|                  |             |           |          |   |   |          |
|------------------|-------------|-----------|----------|---|---|----------|
| Chlamydiae       | 0.162488232 | 1         | 1        | 1 | 1 | 1.00E+00 |
| Margulisbacteria | 0.616726762 | 0.7703518 | 0.413459 | 1 | 1 | 1.00E+00 |
| FBP              | 1           | 0.7703518 | 1        | 1 | 1 | 1.00E+00 |

Figure S3 – Abundance of 5 key phyla in soil from cattle-manure treated columns over time. The effect of day was modeled using a cubic smoothing spline fit with day as a numeric factor and day-treatment as an interaction effect and log abundance was calculated using ANCOM-BC. Note that the model includes day 0 soil samples (prior to manure treatment).

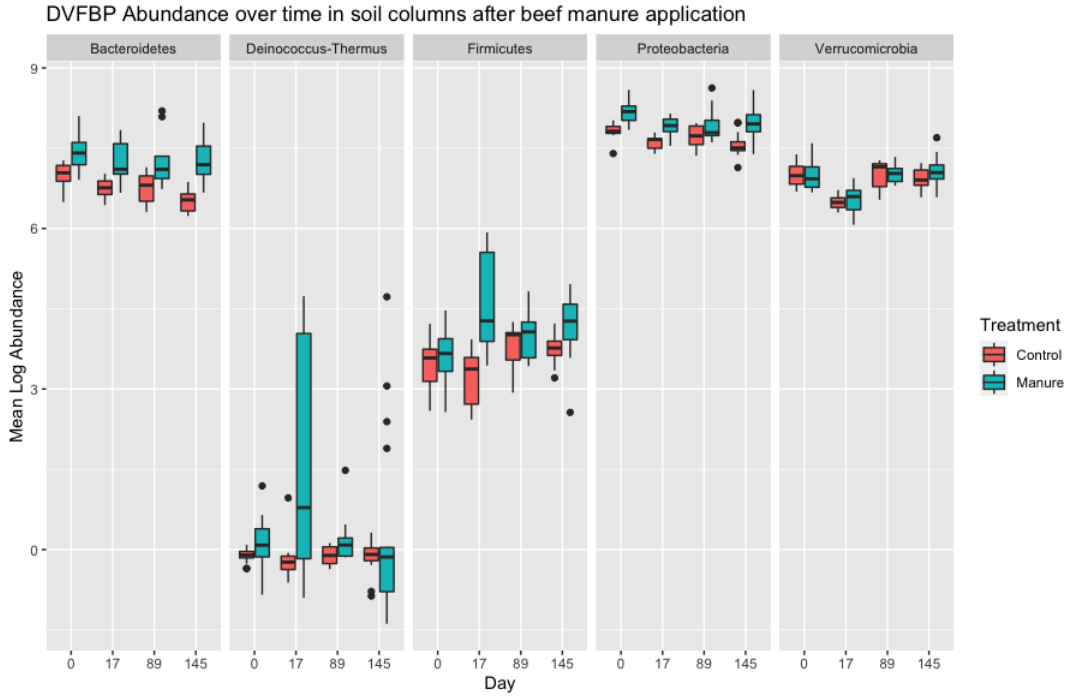



*Table S8 –Mann-Whitney U-test p-values for significant differences in median abundance of ARGs between swine and beef manure sample types, combined control samples, and manure-treated.*

|                        |          |
|------------------------|----------|
|                        | p-value  |
| Manure Samples         | 5.34E-05 |
| Control Samples        | 0.968    |
| Manure-treated Samples | 1.80E-11 |

*Table S9 – Mann-Whitney U-test p-values for differences in median abundance of ARGs in swine or beef manure-treated samples and paired controls.*

| Gene       | Swine Water<br>Day 11 | Swine Water<br>Day 33 | Swine Water<br>Day 61 | Swine Water<br>Day 110 | Swine Water<br>Day 138 | Swine Soil<br>Day 17 | Swine Soil<br>Day 89 | Swine Soil<br>Day 145 | Beef Water<br>Day 11 | Beef Water<br>Day 33 | Beef Water<br>Day 61 | Beef Water<br>Day 110 | Beef Water<br>Day 138 | Beef Soil<br>Day 17 | Beef Soil<br>Day 89 | Beef Soil<br>Day 145 |
|------------|-----------------------|-----------------------|-----------------------|------------------------|------------------------|----------------------|----------------------|-----------------------|----------------------|----------------------|----------------------|-----------------------|-----------------------|---------------------|---------------------|----------------------|
| tetX       | 0.00615061            | NA                    | 0.40465676            | NA                     | NA                     | 0.063603             | NA                   | NA                    | 0.0027784            | 0.4046568            | 0.07401              | NA                    | NA                    | 0.19671             | NA                  | NA                   |
| tetW       | 0.00277843            | NA                    | NA                    | NA                     | NA                     | 0.196706             | NA                   | NA                    | 0.1757343            | NA                   | NA                   | NA                    | NA                    | NA                  | NA                  | 0.40466              |
| tetT       | 0.00277843            | NA                    | NA                    | NA                     | NA                     | 0.063603             | NA                   | NA                    | 0.4046568            | NA                   | NA                   | NA                    | NA                    | 0.50499             | NA                  | NA                   |
| tetO       | 0.00277843            | 0.17573434            | NA                    | NA                     | NA                     | 0.063603             | 0.196706             | 0.404657              | 0.1757343            | 0.4046568            | NA                   | NA                    | NA                    | 0.50499             | NA                  | NA                   |
| tetO       | 0.00366455            | 0.07400997            | 0.40465676            | NA                     | NA                     | 0.063603             | NA                   | NA                    | 0.4046568            | 0.4046568            | NA                   | NA                    | NA                    | NA                  | NA                  | NA                   |
| tetM       | 0.00366455            | 0.02844066            | NA                    | NA                     | NA                     | 0.063603             | NA                   | 0.404657              | 0.0096217            | 0.4046568            | NA                   | NA                    | NA                    | 0.50499             | NA                  | NA                   |
| tetL       | 0.00277843            | NA                    | NA                    | NA                     | NA                     | 0.063603             | NA                   | NA                    | NA                   | NA                   | NA                   | NA                    | NA                    | NA                  | NA                  | NA                   |
| tetH       | 0.00277843            | NA                    | NA                    | NA                     | NA                     | 0.063603             | NA                   | NA                    | 0.0027784            | NA                   | NA                   | NA                    | NA                    | NA                  | NA                  | NA                   |
| tetG       | 0.34075447            | NA                    | 0.65530639            | 0.02844066             | 0.18228718             | NA                   | 0.196706             | 0.404657              | 0.0027784            | 0.0608077            | 0.008658             | 0.7525538             | 0.1797125             | 0.50499             | 1                   | 0.40466              |
| tetB       | 0.07400997            | NA                    | NA                    | NA                     | NA                     | NA                   | NA                   | NA                    | 0.07401              | NA                   | 0.4046568            | NA                    | NA                    | NA                  | 0.50499             | NA                   |
| tetA       | NA                    | NA                    | 1                     | NA                     | NA                     | NA                   | NA                   | NA                    | NA                   | 0.4046568            | NA                   | NA                    | NA                    | NA                  | NA                  | NA                   |
| tet44      | 0.00277843            | 0.40465676            | 0.40465676            | NA                     | NA                     | 0.196706             | 0.504985             | 0.404657              | 0.4046568            | NA                   | NA                   | NA                    | NA                    | NA                  | NA                  | NA                   |
| tet(36)    | 0.00277843            | 0.40465676            | NA                    | NA                     | NA                     | 0.063603             | 0.504985             | NA                    | 0.4046568            | NA                   | NA                   | NA                    | NA                    | 0.50499             | NA                  | NA                   |
| tet(33)    | 0.57247557            | 0.00277843            | 0.93722944            | 0.03794147             | 0.30952381             | 1                    | 0.7                  | 0.280475              | 0.1805029            | 0.0047718            | 0.008658             | 0.3751171             | 0.1797125             | 0.50656             | 0.4                 | 0.57248              |
| tet(32)    | 0.00962172            | NA                    | NA                    | NA                     | NA                     | NA                   | NA                   | NA                    | NA                   | NA                   | NA                   | NA                    | NA                    | NA                  | NA                  | NA                   |
| sul2       | 0.00277843            | 0.02844066            | 0.40465676            | NA                     | NA                     | 0.063603             | NA                   | 0.404657              | 0.0027784            | 0.4619505            | 0.1757343            | 0.4046568             | NA                    | 0.50499             | NA                  | 0.17573              |
| sul1       | 0.00277843            | 0.07400997            | 0.40465676            | 0.40465676             | NA                     | 0.196706             | NA                   | NA                    | 0.0027784            | 1                    | NA                   | NA                    | NA                    | 0.50499             | NA                  | NA                   |
| strB       | 0.00277843            | 0.40465676            | 0.40465676            | NA                     | NA                     | 0.063603             | NA                   | NA                    | 0.0027784            | 0.07401              | 0.0284407            | 0.4046568             | NA                    | 0.50499             | NA                  | 0.40466              |
| strA       | 0.17573434            | NA                    | NA                    | NA                     | NA                     | 0.504985             | NA                   | NA                    | 0.1757343            | NA                   | NA                   | NA                    | NA                    | NA                  | NA                  | NA                   |
| sat4       | 0.00277843            | NA                    | NA                    | NA                     | NA                     | 0.063603             | NA                   | NA                    | NA                   | 0.4046568            | NA                   | NA                    | NA                    | NA                  | NA                  | NA                   |
| mefA       | 0.02844066            | NA                    | NA                    | NA                     | NA                     | 0.504985             | NA                   | NA                    | NA                   | 0.4046568            | NA                   | NA                    | NA                    | 0.50499             | NA                  | NA                   |
| mef(B)     | 0.00962172            | NA                    | NA                    | NA                     | NA                     | 0.504985             | NA                   | NA                    | NA                   | NA                   | NA                   | NA                    | NA                    | NA                  | NA                  | NA                   |
| lnuC       | 0.02844066            | NA                    | NA                    | NA                     | NA                     | 0.063603             | NA                   | NA                    | NA                   | NA                   | NA                   | NA                    | NA                    | NA                  | NA                  | NA                   |
| lnuA       | 0.00277843            | NA                    | NA                    | NA                     | NA                     | 0.504985             | NA                   | NA                    | 0.0284407            | NA                   | NA                   | NA                    | NA                    | 0.50499             | NA                  | NA                   |
| lnu(F)     | 0.00277843            | NA                    | NA                    | NA                     | NA                     | 0.063603             | NA                   | NA                    | 0.4046568            | NA                   | 0.4046568            | NA                    | NA                    | NA                  | NA                  | NA                   |
| ermX       | 0.17573434            | NA                    | NA                    | NA                     | NA                     | NA                   | NA                   | NA                    | NA                   | NA                   | NA                   | NA                    | NA                    | NA                  | NA                  | NA                   |
| ermT       | 0.00962172            | NA                    | NA                    | NA                     | NA                     | 0.196706             | NA                   | NA                    | NA                   | NA                   | NA                   | NA                    | NA                    | NA                  | NA                  | NA                   |
| ermA/ermTR | 0.17573434            | NA                    | NA                    | NA                     | NA                     | NA                   | NA                   | NA                    | NA                   | NA                   | NA                   | NA                    | NA                    | NA                  | NA                  | NA                   |
| erm(F)     | 0.00962172            | NA                    | NA                    | NA                     | NA                     | 0.063603             | NA                   | NA                    | 0.4046568            | NA                   | NA                   | NA                    | NA                    | NA                  | NA                  | NA                   |
| erm(C)     | 0.02844066            | NA                    | NA                    | NA                     | NA                     | NA                   | NA                   | NA                    | NA                   | NA                   | NA                   | NA                    | NA                    | NA                  | NA                  | NA                   |
| erm(B)     | 0.00277843            | 0.07400997            | NA                    | NA                     | NA                     | 0.063603             | NA                   | NA                    | NA                   | 0.4046568            | NA                   | NA                    | NA                    | NA                  | NA                  | NA                   |
| erm(35)    | 0.00277843            | NA                    | 0.40465676            | NA                     | NA                     | 0.063603             | NA                   | NA                    | NA                   | NA                   | NA                   | NA                    | NA                    | NA                  | NA                  | NA                   |
| aph(3)-ia  | 0.00962172            | NA                    | NA                    | NA                     | NA                     | 0.063603             | NA                   | NA                    | NA                   | NA                   | NA                   | NA                    | NA                    | NA                  | NA                  | NA                   |
| ant6-ib    | 0.00277843            | 0.17573434            | NA                    | NA                     | NA                     | 0.076523             | 0.504985             | NA                    | NA                   | NA                   | NA                   | NA                    | NA                    | NA                  | NA                  | NA                   |
| ant6-ia    | 0.00962172            | NA                    | NA                    | NA                     | NA                     | 0.063603             | NA                   | NA                    | NA                   | NA                   | NA                   | NA                    | NA                    | NA                  | NA                  | NA                   |
| aadA9      | 0.02844066            | 0.17573434            | 0.40465676            | NA                     | NA                     | NA                   | NA                   | 0.404657              | 0.0284407            | NA                   | 0.4046568            | NA                    | NA                    | NA                  | NA                  | 0.40466              |
| IS6100     | 0.02499206            | 0.24578549            | 0.79764787            | 0.40465676             | 0.32605752             | 1                    | 1                    | 0.175734              | 0.2215095            | 0.5611487            | 1                    | 1                     | 1                     | 0.50499             | NA                  | 0.40466              |
| IS26       | 0.06085645            | NA                    | NA                    | NA                     | NA                     | 0.063603             | NA                   | NA                    | 0.0284407            | NA                   | NA                   | NA                    | NA                    | NA                  | NA                  | NA                   |
| intI3      | 0.93607468            | 0.00366455            | 0.93722944            | 0.02499206             | 0.30952381             | 0.4                  | 0.7                  | 0.872559              | 0.470393             | 0.0021645            | 1                    | 0.2945516             | 0.525809              | 0.50499             | 0.1                 | 0.48485              |
| intI2      | 0.02844066            | NA                    | NA                    | NA                     | NA                     | 0.063603             | NA                   | NA                    | 0.0027784            | NA                   | NA                   | NA                    | NA                    | NA                  | NA                  | NA                   |
| intI1      | 0.07400997            | 0.12907261            | 0.74834857            | 0.00277843             | 0.24578549             | NA                   | 0.184039             | 0.404657              | 0.1757343            | 0.07401              | 0.3939394            | 0.1757343             | 0.1797125             | NA                  | 0.18404             | 0.54967              |
| IncP_oriT  | 0.40465676            | 0.40465676            | 0.40465676            | 0.40465676             | 0.59926596             | 0.504985             | 0.504985             | 0.404657              | 0.2457855            | NA                   | 0.4046568            | 0.07401               | NA                    | NA                  | NA                  | NA                   |
